# Supplementary material
Source: Research Square preprint supplement (doi:10.21203/rs.3.rs-10031022/v1)
Supplement: Supplementary file 1 [file 31c97e7393099405875116da.docx]

**Definition and Categorized List of General Complications or Comorbidities**

All general complications/comorbidities included in this study were defined as mild to moderate clinical conditions that had been clinically managed and controlled, and did not cause severe, life-threatening health impairment or require urgent invasive interventions during the study period. A categorized list of the general complications/comorbidities recorded in the study is presented below:

- Cardiovascular system diseases

Hypertension, coronary heart disease, venous thrombosis (upper/lower extremity, deep vein, muscular vein), orthostatic hypotension, arrhythmia

- Metabolic and endocrine diseases

Diabetes mellitus, gout, electrolyte disturbance, mild to moderate anemia

- Respiratory system diseases

Chronic obstructive pulmonary disease (COPD), obstructive sleep apnea syndrome, upper respiratory tract infection, non-severe pulmonary infection, chronic rhinitis

- Neurological diseases

Dystonia, paraplegia, tetraplegia, autonomic dysreflexia, neuropathic pain, neurogenic bowel dysfunction, nonorganic sleep disorder, cognitive impairment

- Musculoskeletal system diseases

Joint pain, fractures (including rib fractures, upper limb fractures, lower limb fractures, spinal fractures, skull fractures, etc.), soft tissue contusion, wound infection, osteoporosis, myositis ossificans, joint contracture

- Gastrointestinal system diseases

Diarrhea, constipation, oral ulcer, hematochezia, mild to moderate liver insufficiency

- Skin and soft tissue diseases

Stage 1/2/3 pressure ulcers, first/second-degree burns, tinea pedis, atopic dermatitis

- Psychiatric disorders

Anxiety, depression, post-traumatic stress disorder (PTSD)

- Others

Sexual dysfunction, malnutrition
